# Supplementary material for: Quantifying missing heritability at known GWAS loci.
Source: PLOS journal article supplement (doi:10.1371/journal.pgen.1003993), 2013-01-01
Supplement: S12 (10.1371/journal.pgen.1003993.s012) [file journal.pgen.1003993.s012]

**Table S4. RMSE from  $h^2 = 0.8$  for five LD adjustment schemes.**

| Adjustment     | Genotyped | Imputed |
|----------------|-----------|---------|
| LD pruning     | 0.175     | 0.128   |
| Standard (IBS) | 0.109     | 0.141   |
| LD shrink      | 0.058     | 0.070   |
| LDAK           | 0.028     | 0.026   |
| LD residual    | 0.026     | 0.056   |
