# Supplementary material for: Quantifying missing heritability at known GWAS loci.
Source: PLOS journal article supplement (doi:10.1371/journal.pgen.1003993), 2013-01-01
Supplement: S13 (10.1371/journal.pgen.1003993.s013) [file journal.pgen.1003993.s013]

**Table S5. Fraction of local heritability explained in WTCCC1 simulated phenotypes.**

| A:                                   | # Low-frequency typed causals:   |                 |                 |                  |                  |
|--------------------------------------|----------------------------------|-----------------|-----------------|------------------|------------------|
|                                      | 1                                | 2               | 3               | 5                | 10               |
| $h_{\text{GWAS}}^2$                  | 100%                             | 81%             | 70%             | 55%              | 37%              |
| $h_{\text{GWAS},\text{joint}}^2$     | 101%                             | 86%             | 75%             | 60%              | 46%              |
| $h_g^2$ local (se)                   | <b>60%</b> (3%)                  | <b>66%</b> (3%) | <b>71%</b> (3%) | <b>71%</b> (2%)  | <b>87%</b> (3%)  |
| $h_{g\text{LD}}^2$ local (se)        | 102% (4%)                        | 107% (3%)       | 106% (3%)       | 103% (3%)        | 103% (4%)        |
| $h_{g\text{LD}}^2/h_{\text{GWAS}}^2$ | 1.03                             | <b>1.32</b>     | <b>1.52</b>     | <b>1.86</b>      | <b>2.76</b>      |
| B:                                   | # Common typed causals:          |                 |                 |                  |                  |
|                                      | 1                                | 2               | 3               | 5                | 10               |
| $h_{\text{GWAS}}^2$                  | 100%                             | 82%             | 70%             | 56%              | 37%              |
| $h_{\text{GWAS},\text{joint}}^2$     | 101%                             | 84%             | 71%             | 58%              | 45%              |
| $h_g^2$ local (se)                   | 106% (3%)                        | 104% (2%)       | 102% (2%)       | <b>109%</b> (3%) | <b>110%</b> (2%) |
| $h_{g\text{LD}}^2$ local (se)        | 97% (3%)                         | 89% (3%)        | 92% (3%)        | 100% (3%)        | 102% (5%)        |
| $h_{g\text{LD}}^2/h_{\text{GWAS}}^2$ | 0.98                             | 1.09            | <b>1.32</b>     | <b>1.79</b>      | <b>2.70</b>      |
| C:                                   | # Low-frequency untyped causals: |                 |                 |                  |                  |
|                                      | 1                                | 2               | 3               | 5                | 10               |
| $h_{\text{GWAS}}^2$                  | 39%                              | 32%             | 29%             | 21%              | 14%              |
| $h_{\text{GWAS},\text{joint}}^2$     | 40%                              | 35%             | 34%             | 24%              | 20%              |
| $h_g^2$ local (se)                   | 28% (2%)                         | 29% (2%)        | 31% (2%)        | 24% (2%)         | 23% (3%)         |
| $h_{g\text{LD}}^2$ local (se)        | 47% (3%)                         | 49% (3%)        | 52% (3%)        | 41% (3%)         | 37% (4%)         |
| $h_{g\text{LD}}^2/h_{\text{GWAS}}^2$ | 1.21                             | <b>1.51</b>     | <b>1.80</b>     | <b>1.93</b>      | <b>2.57</b>      |
| D:                                   | # Common untyped causals:        |                 |                 |                  |                  |
|                                      | 1                                | 2               | 3               | 5                | 10               |
| $h_{\text{GWAS}}^2$                  | 66%                              | 55%             | 46%             | 39%              | 26%              |
| $h_{\text{GWAS},\text{joint}}^2$     | 68%                              | 58%             | 46%             | 42%              | 32%              |
| $h_g^2$ local (se)                   | 80% (3%)                         | 80% (2%)        | 75% (2%)        | 84% (2%)         | 80% (2%)         |
| $h_{g\text{LD}}^2$ local (se)        | 77% (3%)                         | 69% (3%)        | 66% (3%)        | 78% (3%)         | 77% (4%)         |
| $h_{g\text{LD}}^2/h_{\text{GWAS}}^2$ | <b>1.16</b>                      | <b>1.25</b>     | <b>1.44</b>     | <b>1.99</b>      | <b>2.89</b>      |
