# Supplementary material for: Quantifying missing heritability at known GWAS loci.
Source: PLOS journal article supplement (doi:10.1371/journal.pgen.1003993), 2013-01-01
Supplement: S31 (10.1371/journal.pgen.1003993.s031) [file journal.pgen.1003993.s031]

**Table S23. Fraction of local heritability explained in RACI simulated phenotypes.**

| A:                                | # Low-frequency untyped causals: |             |            |             |             |
|-----------------------------------|----------------------------------|-------------|------------|-------------|-------------|
|                                   | 1                                | 2           | 3          | 5           | 10          |
| $h_{\text{GWAS}}^2$               | 11%                              | 11%         | 10%        | 8%          | 6%          |
| $h_{\text{GWAS},\text{joint}}^2$  | 39%                              | 35%         | 29%        | 18%         | 28%         |
| $h_g^2$ local (se)                | 68% (1.5%)                       | 65% (2.7%)  | 62% (2.5%) | 56% (3.2%)  | 44% (2.0%)  |
| $h_{g\text{LD}}^2$ local (se)     | 53% (1.2%)                       | 57% (1.1%)  | 54% (1.3%) | 52% (1.5%)  | 67% (0.9%)  |
| $h_{g\text{LD}}^2$ local increase | 4.61                             | 4.96        | 5.23       | 5.96        | 10.80       |
| B:                                | # Common untyped causals:        |             |            |             |             |
|                                   | 1                                | 2           | 3          | 5           | 10          |
| $h_{\text{GWAS}}^2$               | 45%                              | 38%         | 33%        | 28%         | 19%         |
| $h_{\text{GWAS},\text{joint}}^2$  | 66%                              | 56%         | 51%        | 47%         | 49%         |
| $h_g^2$ local (se)                | 101% (1.1%)                      | 107% (0.9%) | 72% (1.0%) | 103% (0.9%) | 103% (0.8%) |
| $h_{g\text{LD}}^2$ local (se)     | 67% (1.2%)                       | 70% (1.4%)  | 69% (1.3%) | 68% (1.0%)  | 69% (1.0%)  |
| $h_{g\text{LD}}^2$ local increase | 1.50                             | 1.83        | 2.05       | 2.39        | 3.62        |

Mean and standard error (se) reported over 30 independent trials.
